# Supplementary material for: A new physiological medium uncovers biochemical and cellular alterations in Lesch-Nyhan disease fibroblasts
Source: PubMed Central journal article supplement (PMC10765874; doi:10.1186/s10020-023-00774-8), 2024-01-03
Supplement: 10020_2023_774_MOESM1_ESM.pdf [file 10020_2023_774_MOESM1_ESM.pdf]

|                                                           | RPMI<br>1640 | HPLM | Plasmax-PV |
|-----------------------------------------------------------|--------------|------|------------|
| <b>Proteogenic amino acids (<math>\mu\text{M}</math>)</b> |              |      |            |
| L-Alanine                                                 | NA           | 430  | 510        |
| L-Arginine                                                | 1149         | 110  | 64         |
| L-Asparagine                                              | 379          | 50   | 41         |
| L-Aspartic acid                                           | 150          | 20   | 6          |
| L-Cysteine                                                | NA           | 40   | 33         |
| L-Glutamate                                               | 136          | 80   | 98         |
| L-Glutamine                                               | 2055         | 550  | 650        |
| Glycine                                                   | 133          | 300  | 330        |
| L-Histidine                                               | 97           | 110  | 120        |
| L-Isoleucine                                              | 382          | 160  | 170        |
| L-Leucine                                                 | 382          | 70   | 140        |
| L-Lysine                                                  | 219          | 200  | 220        |
| L-Methionine                                              | 101          | 30   | 30         |
| L-Phenylalanine                                           | 91           | 80   | 68         |
| L-Proline                                                 | 174          | 200  | 360        |
| L-Serine                                                  | 286          | 150  | 140        |
| L-Threonine                                               | 168          | 140  | 240        |
| L-Tryptophan                                              | 25           | 60   | 78         |
| L-Tyrosine                                                | 111          | 80   | 74         |
| L-Valine                                                  | 171          | 220  | 230        |

|                                                               | RPMI<br>1640 | HPLM | Plasmax-PV |
|---------------------------------------------------------------|--------------|------|------------|
| <b>Non-proteogenic amino acids (<math>\mu\text{M}</math>)</b> |              |      |            |
| $\alpha$ -Aminobutyrate                                       | NA           | 20   | 41         |
| L-Citrulline                                                  | NA           | 40   | 55         |
| L-Cystine                                                     | 208          | 100  | 65         |
| L-Homocysteine                                                | NA           | NA   | 9          |
| 4-Hydroxy-L-proline                                           | 153          | 20   | 13         |
| L-Ornithine                                                   | NA           | 70   | 80         |
| L-Pyroglutamate                                               | NA           | NA   | 20         |
|                                                               | RPMI<br>1640 | HPLM | Plasmax-PV |
| <b>Amino acids derivatives (<math>\mu\text{M}</math>)</b>     |              |      |            |
| L-Acetyl glycine                                              | NA           | 90   | 70         |
| L-Carnosine                                                   | NA           | NA   | 6          |
| Glutathione<br>(reduced)                                      | 3            | 25   | 37         |
| Taurine                                                       | NA           | 90   | 130        |
| Betaine                                                       | NA           | 70   | 72         |

|                              | RPMI<br>1640 | HPLM | Plasmax-PV |
|------------------------------|--------------|------|------------|
| <b>Other components (µM)</b> |              |      |            |
| Acetate                      | NA           | 40   | 42         |
| Acetone                      | NA           | 60   | 55         |
| Acetyl carnitine             | NA           | NA   | 5          |
| Citrate                      | NA           | 130  | 114        |
| Carnitine                    | NA           | 40   | 46         |
| Creatine                     | NA           | 40   | 37         |
| Creatinine                   | NA           | 75   | 74         |
| Formate                      | NA           | 50   | 33         |
| Fructose                     | NA           | 40   | NA         |
| Galactose                    | NA           | 60   | NA         |
| D-Glucose                    | 11101        | 5000 | 5560       |
| Glycerol                     | NA           | 120  | 82         |
| 2-Hydroxybutyrate            | NA           | 50   | 31         |
| 3-Hydroxybutyrate            | NA           | 50   | 77         |
| 3-Hydroxyisobutyrate         | NA           | NA   | 20         |
| Hypoxanthine                 | NA           | 10   | 5          |
| Malonate                     | NA           | 10   | NA         |
| Lonolei acid                 | NA           | NA   | NA         |
| Lipoic acid                  | NA           | NA   | NA         |
| Methyl acetoacetate          | NA           | NA   | 41         |
| Phenol red                   | 13.3         | 14   | 25         |
| Pyruvate                     | NA           | 50   | 100        |

|                             | RPMI<br>1640 | HPLM   | Plasmax-PV |
|-----------------------------|--------------|--------|------------|
| <b>Inorganic salts (µM)</b> |              |        |            |
| Ammonium chloride           | NA           | 40     | 50         |
| Calcium chloride            | NA           | 2350   | 1800       |
| Calcium nitrate             | 424          | 40     | NA         |
| Magnesium chloride          | NA           | 480    | NA         |
| Magnesium sulfate           | 407          | 350    | 813        |
| Potassium chloride          | 5333         | 4100   | 5330       |
| Potassium nitrate           | NA           | NA     | NA         |
| Sodium bicarbonate          | 23810        | 24000  | 26191      |
| Sodium chloride             | 103448       | 106000 | 118706     |
| Sodium phosphate monobasic  | NA           | NA     | 1010       |
| Sodium phosphate dibasic    | 5634         | 951    | NA         |
|                             | RPMI<br>1640 | HPLM   | Plasmax-PV |
| <b>Trace elements (µM)</b>  |              |        |            |
| Ammonium metavanadate       | NA           | NA     | 0.0026     |
| Cupric sulfate              | NA           | NA     | 0.0052     |
| Ferrich chloride            | NA           | NA     | NA         |
| Ferric nitrate              | NA           | NA     | 0.1238     |
| Ferric sulfate              | NA           | NA     | 1.0428     |
| Manganous chloride          | NA           | NA     | 0.0002     |
| Sodium selenite             | NA           | NA     | 0.0289     |
| Zinc sulfate                | NA           | NA     | 1.5        |
