# Supplementary material for: A new physiological medium uncovers biochemical and cellular alterations in Lesch-Nyhan disease fibroblasts
Source: PubMed Central journal article supplement (PMC10765874; doi:10.1186/s10020-023-00774-8), 2024-01-03

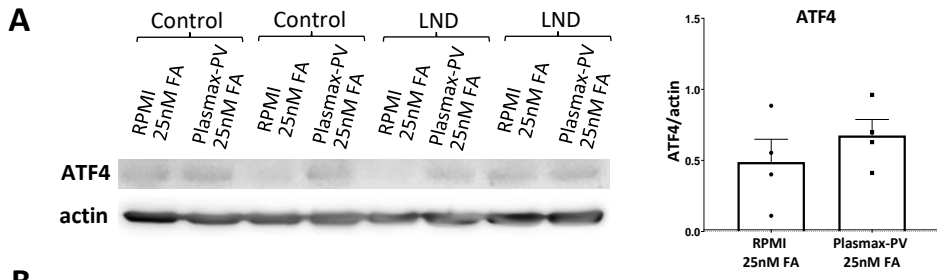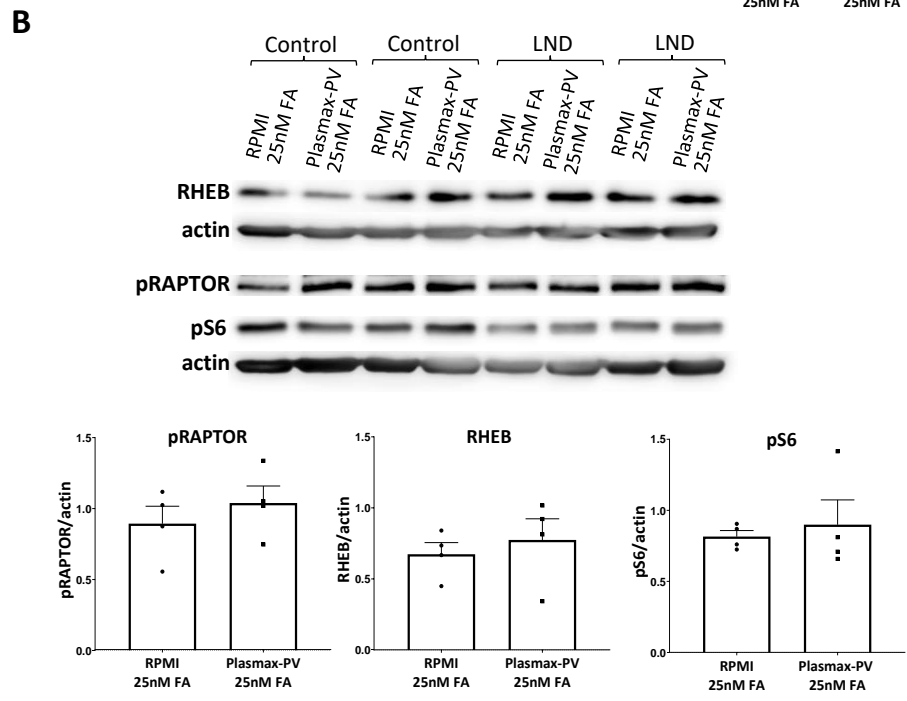

Supplement: 10020_2023_774_MOESM5_ESM.pdf [file 10020_2023_774_MOESM5_ESM.pdf]
